# Supplementary material
Source: PubMed Central journal article supplement (PMC3772987)
Supplement: NIHMS508927-supplement-Supp_Supplemetary_Material.pdf [file NIHMS508927-supplement-Supp_Supplemetary_Material.pdf]

Supporting Online Material

***Borrelia burgdorferi* Oxidative Stress Regulator BosR Directly Represses Lipoproteins  
Primarily Expressed in the Tick during Mammalian Infection**

Peng Wang,<sup>1</sup> Poonam Dadhwal,<sup>2</sup> Zhihui Cheng,<sup>1</sup> Michael R. Zianni,<sup>3</sup>

Yasuko Rikihisa,<sup>1</sup> Fang Ting Liang,<sup>2</sup> and Xin Li<sup>1,\*</sup>

<sup>1</sup> *Department of Veterinary Biosciences, The Ohio State University, 1900 Coffey Road,  
Columbus, OH 43210, USA.*

<sup>2</sup> *Department of Pathobiological Sciences, Louisiana State University, Skip Bertman Drive,  
Baton Rouge, LA 70803, USA.*

<sup>3</sup> *Plant-Microbe Genomics Facility, The Ohio State University, 484 West 12th Avenue,  
Columbus, OH 43210, USA.*

\* For correspondence. E-mail [xin.li@cvm.osu.edu](mailto:xin.li@cvm.osu.edu); Tel. (614) 292-6524; Fax (614) 292-6473.

**Table S1.** Oligos used in this study.

| Name <sup>a</sup>       | Sequence (5' – 3')                        | Purpose     |
|-------------------------|-------------------------------------------|-------------|
| <i>flaB</i> _+441_For   | AGCTGAAGAGCTTGGAATGC                      | q PCR       |
| <i>flaB</i> _+543_Rev   | TTGGTTTGCTCCAACATGAA                      | q PCR       |
| <i>bosR</i> _+41_For    | AAGTCGGCATTACAAACGAT                      | q PCR       |
| <i>bosR</i> _+153_Rev   | TTTTGGGTTTGATGCTATGTAT                    | q PCR       |
| <i>ospA</i> _+166_For   | GCAACAGTAGACAAGCTTGAGC                    | q PCR       |
| <i>ospA</i> _+295_Rev   | GTGTGGTTTGACCTAGATCGTCA                   | q PCR       |
| <i>ospC</i> _+12_For    | TACATTAAGTGCAATATTAATGACT                 | q PCR       |
| <i>ospC</i> _+125_Rev   | AGATTAGGCCCTTTAACAGA                      | q PCR       |
| <i>rpoS</i> _+108_For   | AGGCAATGCAAAAGCAAAAA                      | q PCR       |
| <i>rpoS</i> _+232_Rev   | ATCCCAAGTTGCCTTCTTGA                      | q PCR       |
| <i>bosR</i> _+4_For     | GCGGATCCAACGACAACATAATAGACGTA             | Cloning     |
| <i>bosR</i> _+531_Rev   | CGCTCGAGTCATAA AGTGATTCCTTGTT             | Cloning     |
| 1 <sup>st</sup> Lys_For | AAGAGGAGAAATTA ACTATGAAACATCACCATCACCATCA | Mutagenesis |
| 1 <sup>st</sup> Lys_Rev | TGATGGTGATGGTGATGTTTCATAGTTAATTTCTCCTCTT  | Mutagenesis |
| 2 <sup>nd</sup> Lys_For | ATCACCATCACCATCACAAAAACGACAACATAATAGA     | Mutagenesis |
| 2 <sup>nd</sup> Lys_Rev | TCTATTATGTTGTCGTTTTTGTGATGGTGATGGTGAT     | Mutagenesis |

|                         |                                      |             |
|-------------------------|--------------------------------------|-------------|
| <i>ospA</i> _-330_For_B | ATCAAGACAAACATTGCTGCTTTAA            | EMSA, q PCR |
| <i>ospA</i> _+20_Rev_B  | CCCAATAAATATTTTTTCATAATATATTCTCCTT   | EMSA, q PCR |
| <i>ospA</i> _-330_For_F | ATCAAGACAAACATTGCTGCTTTAA            | Footprint   |
| <i>ospA</i> _+20_Rev_V  | TTCCAATAAATATTTTTTCATAATATATTCTCCTT  | Footprint   |
| <i>rpoS</i> _-277_For_B | CTTGTGTTCTCTTACTGATTTTAAATATATGTTT   | EMSA, q PCR |
| <i>rpoS</i> _+60_Rev_B  | TGCTAAACGGAGGCCAAGTA                 | EMSA, q PCR |
| <i>bosR</i> _-183_For_B | TGTCGTTTATGATTATACCTTTTTTGT          | EMSA, q PCR |
| <i>bosR</i> _+10_Rev_B  | CTGAATTCAAAAATAAAAAATTTAATTTTTTATACT | EMSA, q PCR |
| <i>bicA</i> _-170_For_B | TCTTCTTTTGTATCTATTTTATGCATTGT        | EMSA, q PCR |
| <i>bicA</i> _+159_Rev_B | AGTTTTTTTGTGAATAACAAAGAAATTGGT       | EMSA, q PCR |
| <i>bicA</i> _-1_Rev_B   | AACTATCTCCTTTATATAATTATTATAATAC      | q PCR       |
| 53%G+C_For_B            | CTATTCTGGACTACCTGCTGA                | EMSA        |
| 53%G+C_Rev              | CAATGTCTTTGCGTTTTGCTT                | EMSA        |
| <i>ospD</i> _-231_For_B | AGCATCATTAAACATCCTTTCAACTCA          | EMSA        |
| <i>ospD</i> _+68_Rev_B  | ATCATGAACACAAGATATTGAGAGCAAT         | EMSA        |
| Rnd_For                 | GGGTATGAGTCAATGAAGATGACTGGG          | EMSA, FA    |
| Rnd_Rev                 | CCCAGTCATCTTCATTGACTCATACCC          | EMSA        |
| Rnd_Rev_F               | CCCAGTCATCTTCATTGACTCATACCC          | FA          |

|                        |                              |          |
|------------------------|------------------------------|----------|
| Fur_For                | GGGAAATGATAATAATTATCATTTGGG  | EMSA     |
| Fur_Rev                | CCCAAATGATAATTATTATCATTTCCC  | EMSA     |
| Per_For                | GGGAATTTATAATTATTATAAATTGGG  | EMSA     |
| Per_Rev                | CCCAATTTATAATAATTATAAATTCCC  | EMSA     |
| DR_For                 | GGGTAAATTAATTAATTAATTAATGGG  | EMSA     |
| DR-Rev                 | CCCATTTAATTTAATTTAATTTACCC   | EMSA     |
| RndAT_For              | GGGTATAATATATTTAAAATAAAGGG   | EMSA, FA |
| RndAT_Rev              | CCCTTTATTTTAAATATATTATACCC   | EMSA     |
| RndAT_Rev_F            | CCCTTTATTTTAAATATATTATACCC   | FA       |
| Per/7-0-7_For          | GGGAATTTATAATATTATAAATTGGG   | EMSA     |
| Per/7-1-7_Rev          | CCCAATTTATAATATTATAAATTCCC   | EMSA     |
| Per/7-2-7_For          | GGGAATTTATAATTTATTATAAATTGGG | EMSA     |
| Per/7-2-7_Rev          | CCCAATTTATAATAAATTATAAATTCCC | EMSA     |
| <i>ospA</i> _-60_For_F | TAATCTTATAATATAATTATACTT     | FA       |
| <i>ospA</i> _-37_Rev   | AAGTATAATTATATTATAAGATTA     | FA       |
| <i>ospD</i> _-85_For_F | ATAATTGATATTTAAATATAATTGAT   | FA       |
| <i>ospD</i> _-60_Rev   | ATCAATTATATTTTAAATATCAATTAT  | FA       |

---

<sup>a</sup> Indicates the target gene (when applicable), direction (For, forward; Rev, reverse), and 5'-modification (B, biotin; F, 6-FAM; V, VIC) of the oligo.

**Table S2.** Putative BosR-binding sites.

| Gene    | Location <sup>a</sup> | Spacer <sup>b</sup> | Mismatch <sup>c</sup> | Sequence         |
|---------|-----------------------|---------------------|-----------------------|------------------|
| BB_0001 | -36 ~ -23             | 0                   | 2                     | ATATAATATTATTA   |
| BB_0026 | -115 ~ -101           | 1                   | 2                     | TTAAAATTATTATCC  |
| BB_0027 | -29 ~ -15             | 1                   | 2                     | GGATAATAATTTTAA  |
| BB_0045 | -69 ~ -55             | 1                   | 2                     | TTTTATTTATTATAA  |
| BB_0046 | -37 ~ -23             | 1                   | 2                     | TTATAATAAATAAAA  |
| BB_0050 | -157 ~ -144           | 0                   | 2                     | TTACAATATTAACA   |
| BB_0061 | -70 ~ -55             | 2                   | 2                     | TTATAATTCCTTATTA |
| BB_0062 | -19 ~ -4              | 2                   | 2                     | TAATAAGGAATTATAA |
| BB_0083 | -106 ~ -92            | 1                   | 2                     | TTAAAATAATTATTA  |
|         | -148 ~ -134           | 1                   | 2                     | TTTTAATTATTATAT  |
| BB_0084 | -91 ~ -77             | 1                   | 2                     | TAATAATTATTTTAA  |
|         | -49 ~ -35             | 1                   | 2                     | ATATAATAATTAATAA |
| BB_0096 | -112 ~ -99            | 0                   | 2                     | TTTTAATATTGTAA   |
| BB_0106 | -99 ~ -85             | 1                   | 2                     | TTATTCTTATTATCA  |
| BB_0123 | -147 ~ -134           | 0                   | 2                     | TGATAATTTTATTA   |
|         | -80 ~ -67             | 0                   | 2                     | TTATATTCTTATAA   |

|         |      |   |      |   |   |                  |
|---------|------|---|------|---|---|------------------|
| BB_0133 | -154 | ~ | -141 | 0 | 1 | TTTTAATATTATAA   |
| BB_0134 | -43  | ~ | -30  | 0 | 1 | TTATAATATTTAAA   |
| BB_0142 | -58  | ~ | -43  | 2 | 2 | TTATAATAATTAATCA |
| BB_0143 | -34  | ~ | -19  | 2 | 2 | TGATTAATTATTATAA |
| BB_0142 | -63  | ~ | -50  | 0 | 2 | TTATAAATTATAATAA |
| BB_0143 | -27  | ~ | -14  | 0 | 2 | TTATTATAATATAA   |
| BB_0142 | -68  | ~ | -53  | 2 | 2 | TTGTATTATATTATAA |
| BB_0143 | -24  | ~ | -9   | 2 | 2 | TTATAATATAATACAA |
| BB_0166 | -60  | ~ | -45  | 2 | 2 | TTATTATAATTTATAA |
| BB_0167 | -119 | ~ | -104 | 2 | 2 | TTATAAATTATAATAA |
| BB_0166 | -66  | ~ | -52  | 1 | 1 | TGATATTTATTATAA  |
| BB_0167 | -112 | ~ | -98  | 1 | 1 | TTATAATAAATATCA  |
| BB_0179 | -17  | ~ | -2   | 2 | 2 | TTATAATACATTAAG  |
|         | -69  | ~ | -54  | 2 | 1 | TTATAAGCTATTATAA |
|         | -78  | ~ | -64  | 1 | 2 | TGAAATTAATTATAA  |
| BB_0180 | -82  | ~ | -67  | 2 | 2 | CTTTAATGTATTATAA |
|         | -30  | ~ | -15  | 2 | 1 | TTATAATAGCTTATAA |

|         |      |   |      |   |   |                   |
|---------|------|---|------|---|---|-------------------|
|         | -20  | ~ | -6   | 1 | 2 | TTATAATTAATTTCA   |
| BB_0204 | -81  | ~ | -66  | 2 | 2 | TTATTATCTACTATAA  |
|         | -71  | ~ | -57  | 1 | 2 | CTATAAAGATTATAA   |
| BB_0211 | -37  | ~ | -24  | 0 | 2 | TGAAAATATTAATAA   |
| BB_0217 | -62  | ~ | -47  | 2 | 2 | TTATAATCAATTCTAT  |
| BB_0226 | -92  | ~ | -77  | 2 | 2 | TTATAAGATATTATAT  |
| BB_0227 | -53  | ~ | -38  | 2 | 2 | ATATAATATCTTATAA  |
| BB_0233 | -25  | ~ | -12  | 0 | 2 | TAATAATATTATTA    |
| BB_0253 | -90  | ~ | -77  | 0 | 2 | TTATTATTTTATAA    |
| BB_0254 | -199 | ~ | -186 | 0 | 2 | TTATAAAATAATAA    |
| BB_0260 | -84  | ~ | -70  | 1 | 2 | TTATAGTTATAATAA   |
|         | -94  | ~ | -79  | 2 | 2 | TTATATTATATTATAG  |
| BB_0261 | -149 | ~ | -135 | 1 | 2 | TTATCATTATTATTA   |
|         | -131 | ~ | -116 | 2 | 2 | CTATAATATAATATAA  |
| BB_0309 | -159 | ~ | -145 | 1 | 2 | TTATAAGGATTTTAA   |
|         | -103 | ~ | -90  | 0 | 2 | TTATAAATTTATAA    |
| BB_0328 | -73  | ~ | -58  | 2 | 2 | TTAAAATTTATTAATAA |

|         |             |   |   |                  |
|---------|-------------|---|---|------------------|
| BB_0330 | -34 ~ -19   | 2 | 2 | TTATAAATAATTTTAA |
|         | -131 ~ -118 | 0 | 2 | TTATAATATTTAAAT  |
| BB_0358 | -109 ~ -95  | 1 | 2 | TTTTAATTACTATCA  |
| BB_0360 | -175 ~ -160 | 2 | 2 | TGATAACTTATTATTA |
|         | -18 ~ -5    | 0 | 2 | ATATAATATTTTAA   |
| BB_0381 | -46 ~ -32   | 1 | 2 | TTATAATAAATAGAA  |
| BB_0399 | -97 ~ -82   | 2 | 2 | TTATAATGACCTATAA |
| BB_0403 | -127 ~ -114 | 0 | 2 | TGATATTATTTTAA   |
| BB_0404 | -97 ~ -84   | 0 | 2 | TTAAAATAATATCA   |
| BB_0421 | -96 ~ -83   | 0 | 2 | ATATAATATTATTA   |
| BB_0431 | -64 ~ -50   | 1 | 2 | TTATTATTTTTATCA  |
|         | -72 ~ -59   | 0 | 2 | TTAAAATATTATTA   |
| BB_0445 | -59 ~ -44   | 2 | 2 | GTATAATTTATTATAG |
| BB_0473 | -245 ~ -230 | 2 | 2 | TTATTATTTATTATAT |
| BB_0512 | -68 ~ -54   | 1 | 2 | TTTTCATGATTATAA  |
| BB_0524 | -36 ~ -21   | 2 | 2 | TTAGAATTTATTATTA |
| BB_0543 | -77 ~ -63   | 1 | 2 | TGGTAATTATTATAT  |



|         |             |   |   |                  |
|---------|-------------|---|---|------------------|
|         | -71 ~ -58   | 0 | 2 | TTATTATATAATAA   |
| BB_0551 | -85 ~ -72   | 0 | 2 | AGACAATATTATAA   |
|         | -219 ~ -206 | 0 | 2 | TTATTATTTTATCA   |
| BB_0552 | -170 ~ -157 | 0 | 2 | TTATAATATTGTCT   |
|         | -36 ~ -23   | 0 | 2 | TGATAAAATAATAA   |
| BB_0554 | -238 ~ -225 | 0 | 2 | TTATAATGTTAGCA   |
| BB_0557 | -69 ~ -54   | 2 | 2 | TTTTTATGTATTATAA |
| BB_0560 | -51 ~ -36   | 2 | 2 | TTATGTTATATTATAA |
| BB_0561 | -77 ~ -62   | 2 | 2 | TTATAATATAACATAA |
| BB_0574 | -178 ~ -164 | 1 | 2 | TAATAAAAATTATAA  |
|         | -169 ~ -156 | 0 | 2 | TTATAAGATTAAAA   |
| BB_0576 | -47 ~ -33   | 1 | 2 | ATATACTAATTATAA  |
| BB_0577 | -107 ~ -93  | 1 | 2 | TTATAATTAGTATAT  |
| BB_0582 | -25 ~ -10   | 2 | 2 | CTAAAATATATTATAA |
| BB_0583 | -109 ~ -94  | 2 | 2 | TTATAATATATTTTAG |
| BB_0591 | -14 ~ -1    | 0 | 2 | TAAGAATATTATAA   |
|         | -37 ~ -22   | 2 | 2 | ATATAATTATTTATAA |

|         |             |   |   |                  |
|---------|-------------|---|---|------------------|
| BB_0592 | -115 ~ -102 | 0 | 2 | TTATAATATTCTTA   |
|         | -94 ~ -79   | 2 | 2 | TTATAAATAATTATAT |
| BB_0603 | -106 ~ -91  | 2 | 2 | TGTTAATATATTATAC |
|         | -134 ~ -121 | 0 | 2 | TTTTAATATTATAT   |
| BB_0604 | -69 ~ -56   | 0 | 2 | TTGTAATATTAAAA   |
| BB_0605 | -42 ~ -29   | 0 | 2 | TTTTAATATTACAA   |
| BB_0608 | -66 ~ -51   | 2 | 2 | ATATTATTAATTATAA |
| BB_0610 | -40 ~ -26   | 1 | 1 | TTTTAATAATTATCA  |
| BB_0620 | -122 ~ -108 | 1 | 2 | TGCTAATAAATATAA  |
|         | -150 ~ -135 | 2 | 2 | TTATTATAAAGTATAA |
| BB_0621 | -191 ~ -177 | 1 | 2 | TTATATTTATTAGCA  |
|         | -164 ~ -149 | 2 | 2 | TTATACTTTATAATAA |
| BB_0628 | -46 ~ -31   | 2 | 2 | ATATATTCTATTATAA |
| BB_0647 | -133 ~ -120 | 0 | 2 | TTATACTAATATAA   |
| BB_0649 | -237 ~ -224 | 0 | 2 | TAATAATAATATAA   |
| BB_0657 | -116 ~ -102 | 1 | 2 | TACTAATAATTATAA  |
| BB_0658 | -47 ~ -33   | 1 | 2 | TTATAATTATTAGTA  |

|         |             |   |   |                  |
|---------|-------------|---|---|------------------|
| Bb_0660 | -58 ~ -43   | 2 | 1 | ATATAATTAATTATAA |
| BB_0661 | -62 ~ -47   | 2 | 1 | TTATAATTAATTATAT |
| BB_0664 | -28 ~ -14   | 1 | 2 | TTATAATAATCATAT  |
| BB_0665 | -44 ~ -30   | 1 | 2 | ATATGATTATTATAA  |
| BB_0664 | -48 ~ -34   | 1 | 2 | TTAAAATCCTTATAA  |
| BB_0665 | -24 ~ -10   | 1 | 2 | TTATAAGGATTTTAA  |
| BB_0676 | -190 ~ -175 | 2 | 2 | TTCTAATGAAATATAA |
| BB_0677 | -68 ~ -53   | 2 | 2 | TTATATTTTATTAGAA |
| BB_0680 | -150 ~ -135 | 2 | 2 | TAATAATAGTTTATAA |
| BB_0682 | -65 ~ -52   | 0 | 2 | GTATTATATTATAA   |
| BB_0683 | -42 ~ -29   | 0 | 2 | TTATAATATAATAC   |
| BB_0689 | -62 ~ -47   | 2 | 2 | TTATAATACATAATGA |
|         | -71 ~ -57   | 1 | 1 | ATATAATTATTATAA  |
| BB_0690 | -38 ~ -23   | 2 | 2 | TCATTATGTATTATAA |
|         | -28 ~ -14   | 1 | 1 | TTATAATAATTATAT  |
| BB_0709 | -101 ~ -86  | 2 | 2 | TTATTATTGGTTATAA |
| BB_0727 | -25 ~ -12   | 0 | 2 | TTATAATTCTATAA   |

|         |             |   |   |                   |
|---------|-------------|---|---|-------------------|
| BB_0734 | -97 ~ -84   | 0 | 2 | TTATAATATAAAAA    |
|         | -100 ~ -87  | 0 | 2 | TTATTATAATATAA    |
| BB_0735 | -22 ~ -9    | 0 | 2 | TTTTTATATTATAA    |
|         | -19 ~ -6    | 0 | 2 | TTATATTATAATAA    |
| BB_0756 | -167 ~ -152 | 2 | 2 | TTATAATTGAAAATAA  |
|         | -177 ~ -162 | 2 | 2 | TAATGATATATTATAA  |
| BB_0757 | -49 ~ -34   | 2 | 2 | TTATTTTCAATTATAA  |
|         | -39 ~ -24   | 2 | 2 | TTATAATATATCATTAA |
| BB_0785 | -102 ~ -87  | 2 | 2 | TTAAAATTAATTAATAA |
| BB_0793 | -73 ~ -59   | 1 | 2 | CGATAATTATTATTA   |
|         | -64 ~ -51   | 0 | 2 | TTATTATATAATAA    |
| BB_0804 | -147 ~ -132 | 2 | 2 | TAATAATTTATTATTA  |
| BB_0828 | -31 ~ -16   | 2 | 2 | TTATAATACAATATAT  |
| BB_0829 | -59 ~ -44   | 2 | 2 | ATATATTGTATTATAA  |
| BB_0835 | -66 ~ -51   | 2 | 1 | ATATAATTCATTATAA  |
|         | -89 ~ -74   | 2 | 2 | TGATAATAAATTCTAT  |
| BB_0840 | -106 ~ -93  | 0 | 2 | TAATAATATTAATAA   |

|         |             |   |   |                   |
|---------|-------------|---|---|-------------------|
| BB_0841 | -86 ~ -73   | 0 | 2 | TTTTAATATTATTA    |
| BB_A03  | -106 ~ -91  | 2 | 2 | TAATAATTAATAATAA  |
|         | -35 ~ -21   | 1 | 2 | TAATAATAATTAAAA   |
| BB_A15  | -63 ~ -50   | 0 | 2 | TGTTAATCTTATAA    |
|         | -28 ~ -15   | 0 | 2 | TTATATTAATATAA    |
| BB_A38  | -138 ~ -125 | 0 | 2 | TTATAAAATTTTAA    |
|         | -78 ~ -64   | 1 | 2 | TAATAATTAATATCA   |
| BB_A61  | -53 ~ -40   | 0 | 2 | TTTTAATATTTTAA    |
|         | -219 ~ -204 | 2 | 2 | TTATATTAAAATATAA  |
|         | -224 ~ -209 | 2 | 2 | TGATATTATATTAATAA |
| BB_A62  | -208 ~ -195 | 0 | 2 | TTAAAATATTAATAA   |
|         | -44 ~ -29   | 2 | 2 | TTATATTTTAATATAA  |
|         | -39 ~ -24   | 2 | 2 | TTTTAATATAATATCA  |
| BB_A66  | -36 ~ -21   | 2 | 2 | TTAAAATTCATTAAAA  |
|         | -72 ~ -57   | 2 | 2 | TAATAATTAATTTTAA  |
| BB_A68  | -81 ~ -67   | 1 | 2 | TGACAATTATTGTAA   |
| BB_A69  | -62 ~ -49   | 0 | 2 | TTATAATATTATTT    |

|          |      |   |      |   |   |                  |
|----------|------|---|------|---|---|------------------|
|          | -71  | ~ | -57  | 1 | 2 | TTAATATAATTATAA  |
|          | -101 | ~ | -88  | 0 | 2 | TAATAATATTATTA   |
| BB_A0078 | -152 | ~ | -139 | 0 | 2 | TTAAAATATTTAAAA  |
| BB_B01   | -85  | ~ | -70  | 2 | 2 | TTAAAATATAATATAA |
| BB_B04   | -70  | ~ | -57  | 0 | 2 | TTATATTATAATAA   |
| BB_B04   | -128 | ~ | -114 | 1 | 2 | TTATAAATATTGTAA  |
| BB_B04   | -223 | ~ | -210 | 0 | 2 | ATATTATATTATAA   |
| BB_B05   | -229 | ~ | -216 | 0 | 2 | TTATTATAATATAA   |
| BB_B05   | -172 | ~ | -158 | 1 | 2 | TTACAATATTTATAA  |
| BB_B05   | -76  | ~ | -63  | 0 | 2 | TTATAATATAATAT   |
| BB_B16   | -169 | ~ | -156 | 0 | 2 | TTATAATCTTTTCA   |
| BB_D001  | -50  | ~ | -37  | 0 | 1 | CTATAATATTATAA   |
| BB_D04   | -222 | ~ | -207 | 2 | 2 | ATATGATTTATTATAA |
| BB_D10   | -36  | ~ | -22  | 1 | 2 | TTAAAATAAATATAA  |
| BB_D15   | -158 | ~ | -143 | 2 | 2 | TTATATTTCTTTATAA |
|          | -220 | ~ | -207 | 0 | 2 | TGATAATAATTTAA   |
| BB_E17   | -40  | ~ | -27  | 0 | 2 | TTAGAATAGTATAA   |

|        |      |   |      |   |   |                  |
|--------|------|---|------|---|---|------------------|
| BB_F06 | -225 | ~ | -210 | 2 | 1 | ATATAATTTATTATAA |
| BB_F20 | -129 | ~ | -115 | 1 | 2 | TTTTAATTATTAATAA |
| BB_G01 | -101 | ~ | -86  | 2 | 2 | TTATATTTTATTGTAA |
| BB_G07 | -105 | ~ | -92  | 0 | 2 | TTAGAATATAATAA   |
|        | -85  | ~ | -71  | 1 | 2 | TAATAATAATTATTA  |
|        | -73  | ~ | -58  | 2 | 2 | TTATTATGAATTATTA |
| BB_H02 | -168 | ~ | -155 | 0 | 1 | CTATAATATTATAA   |
| BB_H04 | -129 | ~ | -116 | 0 | 2 | CTATAATATTATGA   |
| BB_H40 | -18  | ~ | -4   | 1 | 2 | TTATAATTATAAAAAA |
| BB_I02 | -126 | ~ | -111 | 2 | 2 | TGTAAATACATTATAA |
| BB_I12 | -34  | ~ | -20  | 1 | 2 | CTATAATAATTTTAA  |
| BB_I16 | -237 | ~ | -223 | 1 | 2 | TTTAAATAATTATAA  |
|        | -55  | ~ | -41  | 1 | 1 | TTATAATAAATATAA  |
| BB_I36 | -64  | ~ | -51  | 0 | 1 | TTGTAATATTATAA   |
|        | -80  | ~ | -67  | 0 | 1 | TGATAATAATATCA   |
| BB_I38 | -64  | ~ | -51  | 0 | 1 | TTGTAATATTATAA   |
|        | -80  | ~ | -67  | 0 | 1 | TGATATTATTATCA   |

|          |             |   |   |                    |
|----------|-------------|---|---|--------------------|
| BB_I39   | -64 ~ -51   | 0 | 2 | TTGTAATATTATAT     |
|          | -74 ~ -59   | 2 | 2 | TGATATTA AATTGTAA  |
| BB_I41   | -21 ~ -7    | 1 | 2 | ATATTATAATTATAA    |
|          | -26 ~ -13   | 0 | 2 | ATATGATATTATAA     |
| BB_J08   | -116 ~ -101 | 2 | 2 | TTATATTTTATTGTAA   |
|          | -66 ~ -51   | 2 | 2 | TTATTATTATTTATAA   |
| BB_J09   | -148 ~ -133 | 2 | 2 | TGATATTA A AATATAA |
|          | -131 ~ -116 | 2 | 2 | TGATATTA A AATATAA |
|          | -114 ~ -99  | 2 | 2 | TGATATTA A AATATAA |
|          | -97 ~ -82   | 2 | 2 | TGATATTA A AATATAA |
|          | -80 ~ -65   | 2 | 2 | TGATATTA A AATATAA |
|          | -63 ~ -48   | 2 | 2 | TGATATTGAAATATAA   |
|          | -46 ~ -31   | 2 | 2 | TGATATTA A AATATAA |
| BB_J19   | -37 ~ -23   | 1 | 2 | TAATAATAATTATTA    |
| BB_J0056 | -114 ~ -100 | 1 | 2 | TAATAATTATTATTA    |
| BB_J36   | -54 ~ -41   | 0 | 2 | TTATAATA A AATAA   |
| BB_J41   | -64 ~ -51   | 0 | 2 | TTGTAATATTATTA     |



|        |             |   |   |                  |
|--------|-------------|---|---|------------------|
| BB_J46 | -41 ~ -28   | 0 | 1 | TTATAATATTATAT   |
| BB_K01 | -41 ~ -27   | 1 | 2 | TTATAATAATTATTC  |
|        | -48 ~ -33   | 2 | 2 | TTATTATTTATAATAA |
|        | -101 ~ -86  | 2 | 2 | TTACAATTTATTGTAA |
| BB_K15 | -208 ~ -194 | 1 | 2 | TTATAATGACTACTA  |
|        | -191 ~ -177 | 1 | 2 | TAATATTTATTATAA  |
| BB_K47 | -79 ~ -65   | 1 | 1 | TTATAATTATTATTA  |
|        | -87 ~ -74   | 0 | 2 | TTTTTATATTATAA   |
| BB_K49 | -79 ~ -65   | 1 | 1 | TTATAATTATTATTA  |
|        | -87 ~ -74   | 0 | 2 | TTTTTATATTATAA   |
| BB_K50 | -46 ~ -31   | 2 | 2 | TGATAAAATATTCTAA |
| BB_L35 | -130 ~ -116 | 1 | 2 | TTATGATTTTTATAA  |
|        | -53 ~ -39   | 1 | 2 | TTAAAATAATTATGA  |
| BB_M35 | -244 ~ -230 | 1 | 2 | TTTTATTTATTATAA  |
| BB_N19 | -57 ~ -44   | 0 | 2 | TTATGATATTAACA   |
| BB_N35 | -244 ~ -230 | 1 | 2 | TTTTATTTATTATAA  |
| BB_P30 | -36 ~ -21   | 2 | 2 | TAATAATTAATTATTA |

|        |      |   |      |   |   |                  |
|--------|------|---|------|---|---|------------------|
| BB_P35 | -244 | ~ | -230 | 1 | 2 | TTTTATTTATTATAA  |
| BB_Q05 | -213 | ~ | -200 | 0 | 2 | TTATATTATTATTA   |
|        | -149 | ~ | -136 | 0 | 1 | TTAAAATATTATAA   |
| BB_Q42 | -130 | ~ | -116 | 1 | 2 | TTATGATTTTTATAA  |
| BB_Q85 | -222 | ~ | -207 | 2 | 2 | ATATGATTTATTATAA |
| BB_Q89 | -50  | ~ | -37  | 0 | 1 | CTATAATATTATAA   |
| BB_R36 | -244 | ~ | -230 | 1 | 2 | TTTTATTTATTATAA  |
| BB_R41 | -94  | ~ | -79  | 2 | 2 | TGATAATTTCTTGTA  |
| BB_S41 | -180 | ~ | -165 | 2 | 2 | TTATAATCTTTTGTA  |
| BB_T02 | -104 | ~ | -89  | 2 | 2 | TGTAAATACATTATAA |
| BB_U02 | -126 | ~ | -111 | 2 | 2 | TGTAAATACATTATAA |

---

<sup>a</sup> Location of each site is shown as relative to the start of each gene. Only sites within 250 bps upstream of a gene are shown.

<sup>b</sup> Indicates the length of the spacer in base pairs.

<sup>c</sup> Indicates the number of mismatches from the consensus sequence T(T/G)ATAAT-N{0,2}-ATTAT(A/C)A.

## References

- Burtnick, M.N., J.S. Downey, P.J. Brett, J.A. Boylan, J.G. Frye, T.R. Hoover & F.C. Gherardini, (2007) Insights into the complex regulation of *rpoS* in *Borrelia burgdorferi*. *Mol Microbiol* **65**: 277-293.
- Jonsson, M., L. Noppa, A.G. Barbour & S. Bergstrom, (1992) Heterogeneity of outer membrane proteins in *Borrelia burgdorferi*: comparison of osp operons of three isolates of different geographic origins. *Infect Immun* **60**: 1845-1853.
- Margolis, N., D. Hogan, K. Tilly & P.A. Rosa, (1994) Plasmid location of *Borrelia* purine biosynthesis gene homologs. *J Bacteriol* **176**: 6427-6432.
- Norris, S.J., C.J. Carter, J.K. Howell & A.G. Barbour, (1992) Low-passage-associated proteins of *Borrelia burgdorferi* B31: characterization and molecular cloning of OspD, a surface-exposed, plasmid-encoded lipoprotein. *Infect Immun* **60**: 4662-4672.

**PospAB, -330 ~ +20, 20% G+C**

ATCAAGACAAACATTGCTGCTTTAAAAAATCACATTGACAAAATAAAACCAATTGCAATGCAGATTTACAAAAATACTCAAAAAATATACCTTAATACT  
TTAAAAGACATTTAACTTTTCTTTTCTGAAAGTCCCAAACTGGGACTTTTTTTAAATAAAAAATCTACATTAATCTAAGCTTAATTAGAACCAAAC  
TTAATTAACCAAACCTAATTGAAGTTATTATCATTTTATTTTTTTTCAATTTTCTATTTGTTAATTGTTAATCTATAATATAATATACCTGTATTA  
AGTTATATTAATATAAAAGGAGAAATATATATGAAAAAATATTTTATTGGG

**PospD, -231 ~ +68, 19% G+C**

AGCATCATTAAACATCCTTTCAACTACTACTATTGTTTTCTTAGCCTTAAGCTAGCCAAGCTAAATAGAAATTAGTAGGCAATTGATATTAATA  
TAATTGATATTAATAATAATTGATATTAATAATAATTGATATTAATAATAATTGATATTAATAATAATTGATATTAATAATAATTGATATTAATA  
TATAATTTAAGACATTATATTTAAGGAGTATAAATATGAAAAAATATAAAAAATACTACTGTTAAGTTTATTTTTATTGCTCTCAATATCTTGTGTTTAT  
GAT

**PrpoS, -277 ~ +60, 28% G+C**

TGCTAAACGGAGGCCAAGTAGAAGAAATTTTTGAAGATATGCTTTGCGAACAAAGAGCAAAACAAATGGCACAAGCTCAAAGCTTTGGCCTTGCCGATT  
TAATTTACAATGAATTACAAAAAGTAAATAATCAAAAAATACTCCCCCTAAACTCAAAATATATCCTATTTAGTTTAAACCATTTTTAAATTAAT  
TGGCACAGTTTTTGCATGGAAATTAAGTAGTAAAACTTAATCACAATATTCAGAAAGGGGAGAAAATATAATAACTATGAACATATTTAGTAATGAGG  
ATTTAAACATATATTTAAATCAGTAAGAGAACACAAG

**PbicA, -170 ~ +159, 21% G+C**

TCTTCTTTGTATCTATTTATGCATTGTACTTAAATTGCATGCTTGAGATAAAAACAGTGTAAAAATTATAATCAATTTTTTCATTAAATATCCTTTTT  
ATTTATATAGGTATTAACCATAATTATATCTCATTATGTATTATAATAATTATATAAAGGAGATAGTTATGGAAAAGTATTTAAGCTATATAAAAAAG  
GATGATTTAGACGCAATACAATTAATAAATACAAGAATTGTAGCAAGTTTGCATATTTTTTATTCTAATTTAAGAGGTATTCATTGGAATATAAAAAAGATA  
CCAATTTCTTTGTATTACAAAAAACT

**PbosR, -183 ~ +10, 15% G+C**

AATTTTGATAACAAAATAAACTGAATTCAAAAATAAAAAATTTAATTTTTTATACTAATATAAAAAATATGAAAAATAAATAAATAAAGTAGTAAAA  
TATTAATAACTGGGTATAAAATATCCTAAGAAGAACATAAAAAAGTATTTAATCTTAATTTAAACAAAAAGGTATAATCATATGAACGACA

**PospC, -330 ~ +23, 22% G+C**

ACTTTTGTATAAACGCCAATTTCTCTAATTTCTTCTGCAATTAGTTGGCTATATTGGGATCCAAAATCTAATACAAGTATTGCCTGAGTATTCATTA  
TATAAGTCCTTAAATAAATTAACCTTTTTTTTATTAAGTATACTTCATTTAATTTTAGCATATTTGGCTTTGCTTATGTGCGATTTTAAATCAAATTA  
GACAATATTTTCAAATCTTCAATATTTATTCAAGATATTGAAGAATTTGAAAAAATATTTTTTCAAATAAAAAATGAAACAAAATTTGTTGGACT  
AATAATTCATAAATAAAAGGAGGCACAAATTAATGAAAAAGAATACATTAAGTGC

**Pech193, -246 ~ +3, 23% G+C**

GAGAAATATAACCTTTAAATATGTTGAATACTTTCAAATCATAACATAATAGTATGGTGAAGTCAAATGAAAAATGCATTTTAAATATTTAAATCTT  
ATCTTTAAGTTCTTTGAGGAAAATAAGAAATTTGCAATATGTTGTTAAAGCAATATGATTAATTAGTCAAGCTTGTCAAATATGAAAAAGTAAAAAG  
ATGTCCTTTTTGAAAAGGATATGTAATAGGAGGATATTTAAGTTATATG

**Pech818, -542 ~ +3, 25% G+C**

AAGCATATCTTTTAAATGTTTTAAAAATTTTTCTAGTTAGGTCTATGTATAGCATTATAAAAAATACTTGAAGCTTTAAACATTTTTAAGCTGTAATTAT  
GTGTGCTTATTTGCAACAGATATAATTTATGCGCAAATGTGTAGTACATATGAATAATACAACTTAAAAACAAGTAAAAAGTGCCTTTATGAAGGATA  
ATTTTTAACTGAAGTACCAATAAGCAAAGTCAATATAAGTAAAAATGTACATTTGTATGTGTACAGCTTAAATGGTTATAATTGGTAGGGAATTTGT  
ATATTGAATAGTAGATTATTTGATTGTTGTGCTATAGCTTATGTTGATAAATAGACACTAAATTTGTGTTAATATGTATATTTTATAGTAAAAATGT  
TTTGTCTTAAACATCAAATCAGAATAGTATTGTTGAGCATGTAGTAAAGGATATATCCTAAAATCAAGTATTGTTAATAGTATTGACACAGAGAATAAAT  
GAGGTTATATCTTTTTATTCTGTTATAATTAGTGTCTAAAATG

**53% G+C**

CTATTTGACTACTCTGCTGACGCTGCACCCGGTTCGTAAGTGGACAACAAAATTTAGGACGCAATGCTGGCCCGCGGATTGAACGTGCCGAAGAACT  
GGGCCCGGATCTGGACAACTGACCTTTATCGATGAAGACCTGACGAAACATGGCAAAAAAGATTTTCGGTGCCTGGCCAGCAATCCGGATATCCAGACC  
CTGGTGGGCGCCCGCTGCGTGCAGGTAATGTTGCACTGGCTAAATCTATCGAACAACTGATCCCGGAAGCGAAACGCAAAGACATTG

**Fig S1.** Sequences of EMSA probes. Whenever applicable, the position of a probe is indicated as relative to the start of a gene, and the ATG start codon and the Shine-Dalgarno sequence of each gene are indicated with double underlines. The transcription start sites for *ospAB*, *ospD*, *rpoS*, and *ospC* had been previously determined (Jonsson *et al.*, 1992; Norris *et al.*, 1992; Burtnick *et al.*, 2007; Margolis *et al.*, 1994) and are indicated with asterisks. Putative -35, -24/-12, and -10 promoter regions that precede these experimentally determined transcription start sites are indicated with brackets.

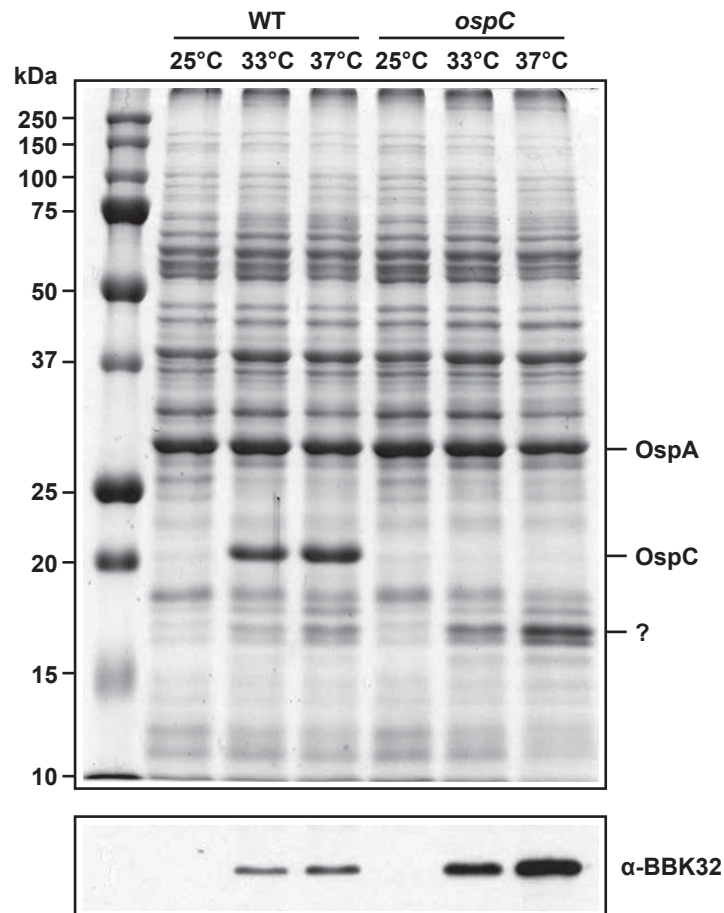

**Fig. S2.** Up-regulation of BBK32 in an *ospC* mutant. The *ospC* mutant was constructed from an infectious clone of *B. burgdorferi* strain 297. Up-regulation of BBK32 in the *ospC* mutant was evident in an immunoblot analysis using  $\alpha$ -BBK32 antibodies. The identity of another protein that was also significantly up-regulated in the *ospC* mutant, indicated by a question mark, remains unknown. However, given that this protein was significantly up-regulated at 37°C and also reacted strongly with sera from mice infected with *B. burgdorferi* through tick inoculation (data not shown), this protein could be a lipoprotein belonging to the RpoS regulon.

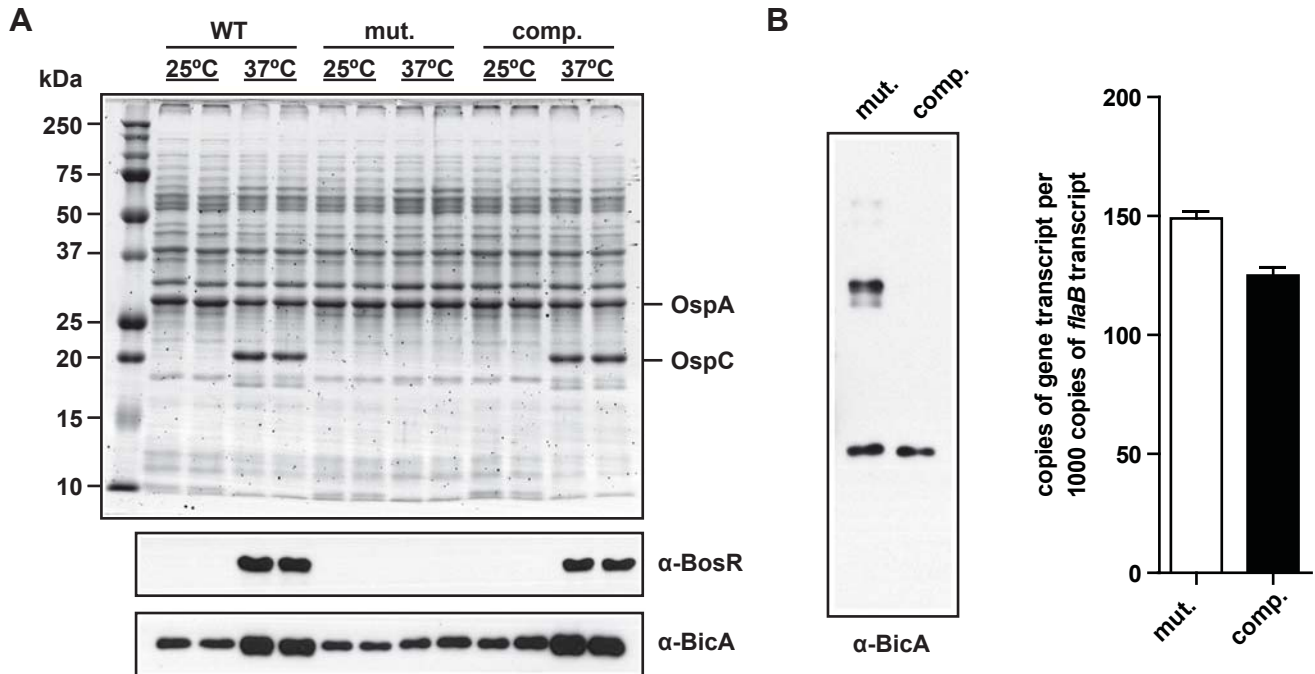

**Fig. S3.** BosR-dependent activation and repression of BicA. (A) When cultured *in vitro*, BicA expression in the wild type (WT) was significantly elevated at 37°C as compared to 25°C. This activation was clearly dependent on BosR based on analyses of the *bosR* mutant (mut.) and the complemented *bosR* mutant (comp.). (B) In host-adapted spirochetes harvested from DMCs, the presence of BosR (comparing the complemented strain with the *bosR* mutant) appeared to be associated with a modest reduction in the BicA protein level (left) as well as in the *bicA* mRNA level (right).

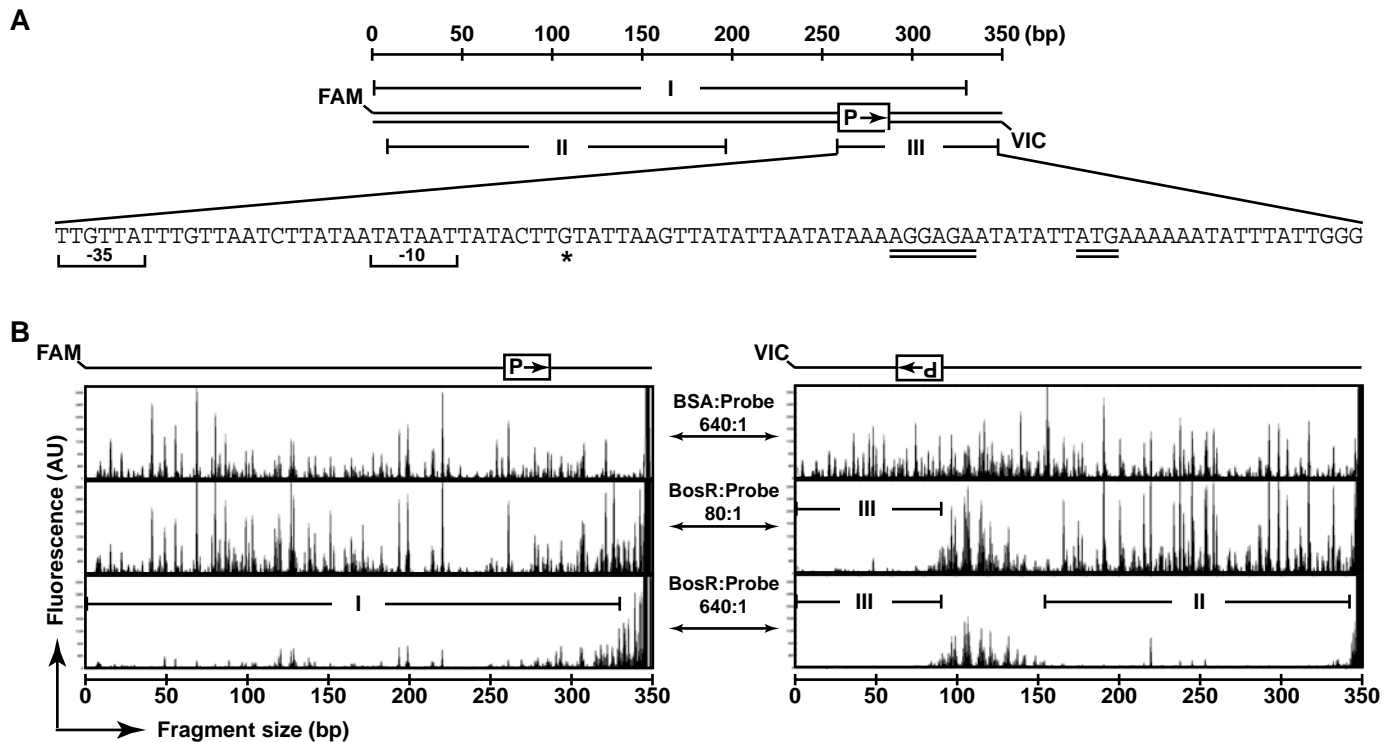

**Fig. S4.** Footprint analysis of BosR binding to  $P_{ospAB}$ . (A) A 350-bp DNA fragment containing the *ospAB* promoter was PCR amplified using a pair of primers, one labeled at the 5' end with FAM and the other labeled at the 5' end with VIC. (B) Electropherograms of DNase I-digested probe following incubation with 640-fold molar excess of BSA or 80- or 640-fold molar excess of BosR. The y-axis scale is the same for all electropherograms, ranging from 0 to 3,000 arbitrary units (AU). The direction of the promoter (P) is indicated with an arrow. Three regions of the probe that were protected from DNase I digestion by BosR are designated I, II, and III. The nucleotide sequence of the opposite strand of footprint III is shown. The -35 and -10 promoter regions are indicated with brackets, and the Shine-Dalgarno sequence and the ATG start codon are indicated with double underlines. The transcription start site, as previously determined (Jonsson et al., 1992), is indicated with an asterisk.
